# Supplementary material for: Sex-dependent membranopathy in stored human red blood cells
Source: PubMed Central journal article supplement — Haematologica. 2021 Jul 8;106(10):2779–82. doi: 10.3324/haematol.2021.278895 (PMC8485678; doi:10.3324/haematol.2021.278895), 2021-07-08
Supplement: 2021_278895_MALYSIAK_SUPPL.pdf [file 2021_278895_MALYSIAK_SUPPL.pdf]

**Sex-dependent membranopathy in stored human red blood cells**

---

*Ewa Szczesny-Malysiak,<sup>1</sup> Tasnim Mohaissen,<sup>1,2</sup> Katarzyna Bulat,<sup>1</sup> Magdalena Kaczmarska,<sup>1</sup> Aleksandra Wajda<sup>1,3</sup> and Katarzyna M. Marzec<sup>1</sup>*

*<sup>1</sup>Jagiellonian Center for Experimental Therapeutics, Jagiellonian University; <sup>2</sup>Faculty of Pharmacy, Jagiellonian University Medical College and <sup>3</sup>Faculty of Materials Science and Ceramics, AGH University of Science and Technology, Krakow, Poland*

*Correspondence: KATARZYNA MARIA MARZEC - [katarzyna.marzec@jcet.eu](mailto:katarzyna.marzec@jcet.eu)*

*doi:10.3324/haematol.2021.278895*

## SUPPLEMENTARY INFORMATION

**Title: Sex-dependent membranopathy in stored human red blood cells**

Running title: Sex-dependent membranopathy in stored human RBCs

Ewa Szczesny-Malysiak<sup>1</sup>, Tasnim Mohaissen<sup>1,2</sup>, Katarzyna Bulat<sup>1</sup>, Magdalena Kaczmarska<sup>1</sup>, Aleksandra Wajda<sup>1,3</sup>,  
Katarzyna M. Marzec<sup>1\*</sup>

<sup>1</sup>*Jagiellonian Centre for Experimental Therapeutics, Jagiellonian University, 14 Bobrzynskiego St., 30-348 Krakow, Poland;*

<sup>2</sup>*Faculty of Pharmacy, Jagiellonian University Medical College, 9 Medyczna St., 30-688, Krakow, Poland;*

<sup>3</sup>*Faculty of Materials Science and Ceramics, AGH University of Science and Technology, 30 Mickiewicza St., 30-059 Krakow, Poland.*

### **Corresponding author**

Katarzyna Maria Marzec, PhD

Email: katarzyna.marzec@jcet.eu

phone: +48 12 6645476; fax: +48 12 2974615

### **Data sharing statement**

For original data please visit <http://dx.doi.org/10.17632/dwxw2wwjtm.1>

Men

Women

I

II

III

A

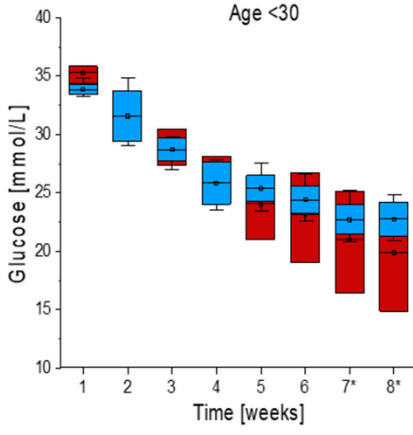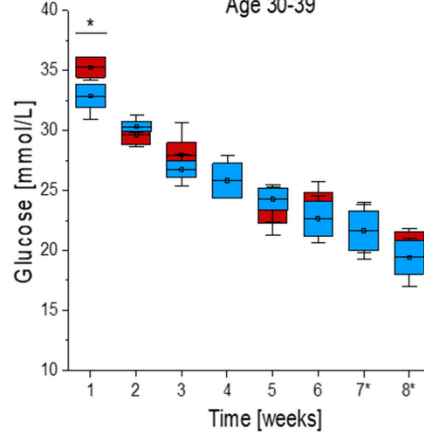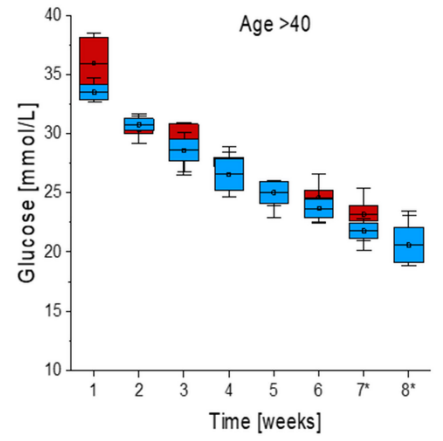

B

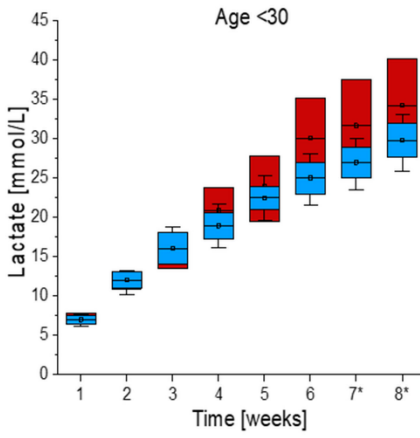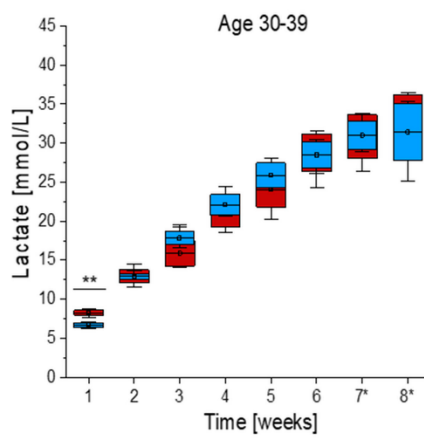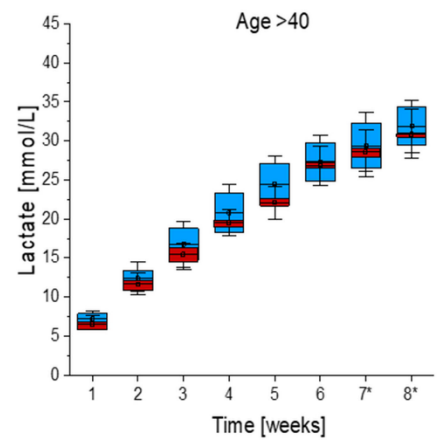

C

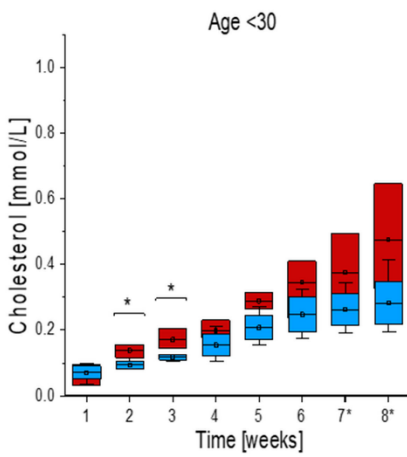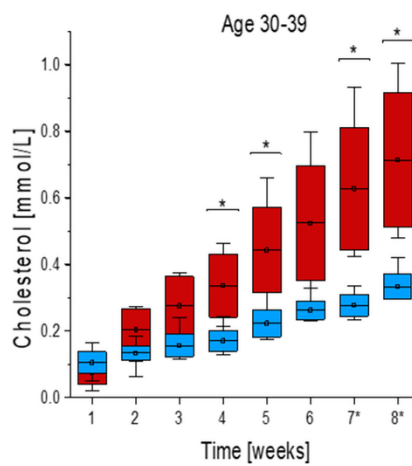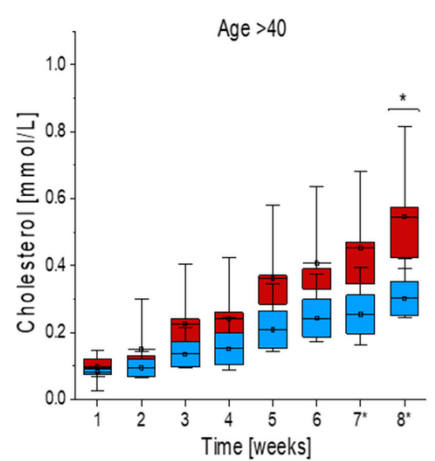

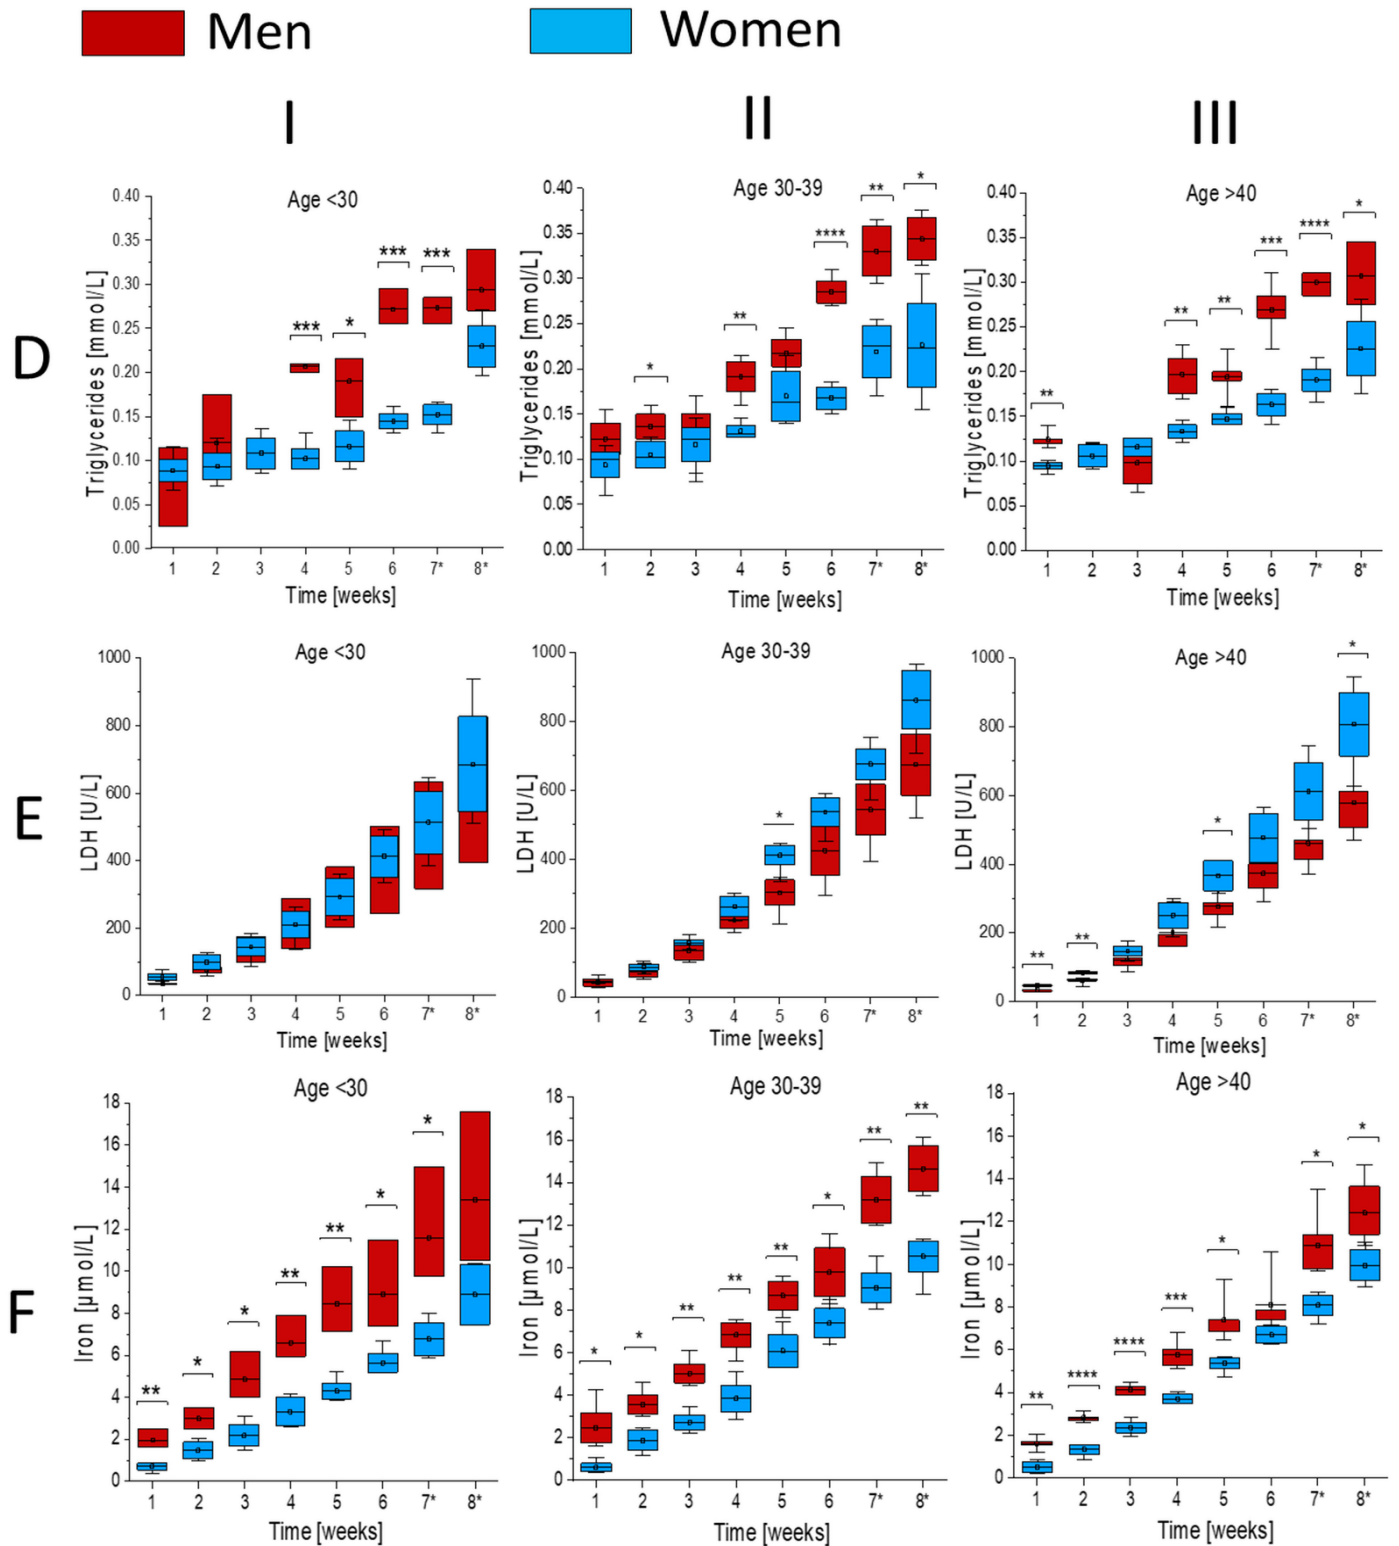

**Supplementary Figure 1. Storage time-dependent changes in biochemical parameters: (A) Glucose, (B) Lactate, (C) Cholesterol, (D) Triglycerides, (E) LDH and (F) Iron in human pRBCs.** The blood was withdrawn from both men (N=12) and women (N=12) aged (I) <30, (II) 30-39 and (III) >40. Data distribution is presented as box plots (mean, Q1, Q3, interquartile range, min-max whiskers). Q1, Q3 indicate 25<sup>th</sup> and 75<sup>th</sup> percentiles, respectively. Data normality was assessed using Shapiro-Wilk test. The significance of the differences between the means was evaluated either by one-way ANOVA with Tukey's post-hoc test or by Kruskal-Wallis test if appropriate; \* $p < 0.05$ , \*\* $p < 0.01$ , \*\*\* $p < 0.001$ , \*\*\*\* $p < 0.0001$  indicates significant difference between men and women in each week. \* weeks 7 and 8 are additional measurements exceeding expiration date.

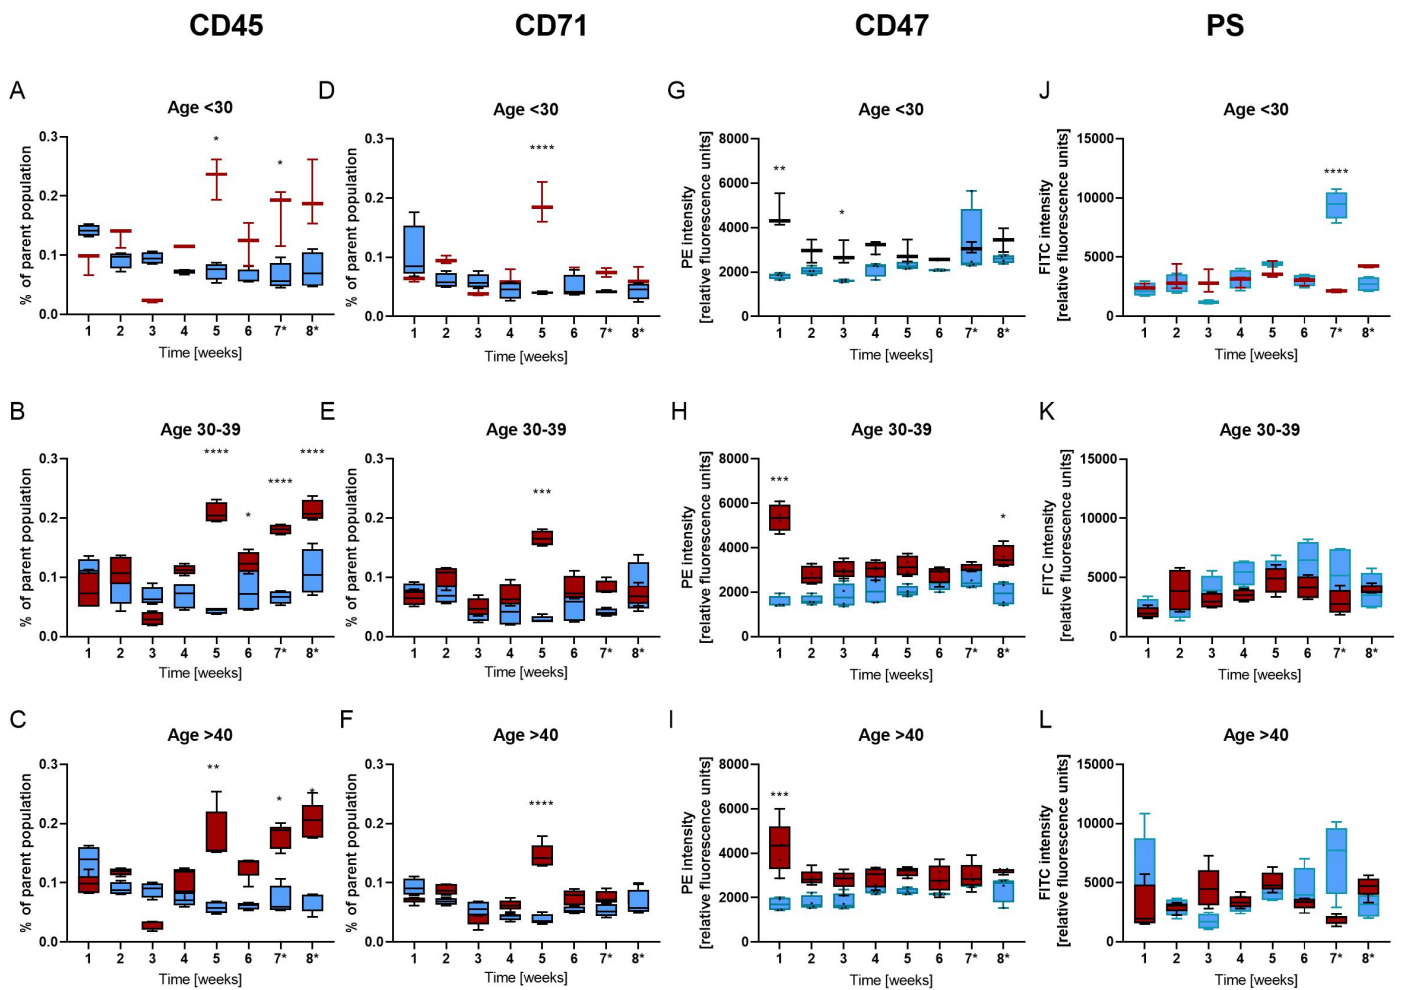

**Supplementary Figure 2. Storage time-dependent changes in CD45 (A-C), CD71 (D-F), CD47 (G-I) and phosphatidylserine-PS (J-L) expression in human pRBCs.** The blood was withdrawn from men (N=12) and women (N=12) aged (A,D,G,J) <30, (B,E,H,K) 30-39 and (C,F,I,L) >40. Fluorescence was measured weekly with use of flow cytometry throughout 8 weeks of storage, \* weeks 7 and 8 are additional measurements exceeding expiration date. Data are presented as a percent of parent population. Data distribution is presented as box plots (median, Q1, Q3, interquartile range, min-max whiskers). Q1, Q3 indicate 25th and 75th percentiles, respectively. Data normality was assessed using Shapiro-Wilk test. The significance of the differences between the medians was evaluated either by one-way ANOVA with Sidak's post-hoc test or by Kruskal-Wallis test with Dunn's post-hoc test if appropriate; \* $p < 0.05$ , \*\* $p < 0.01$ , \*\*\* $p < 0.001$ , \*\*\*\* $p < 0.0001$ , indicates significant difference between men and women in each week.

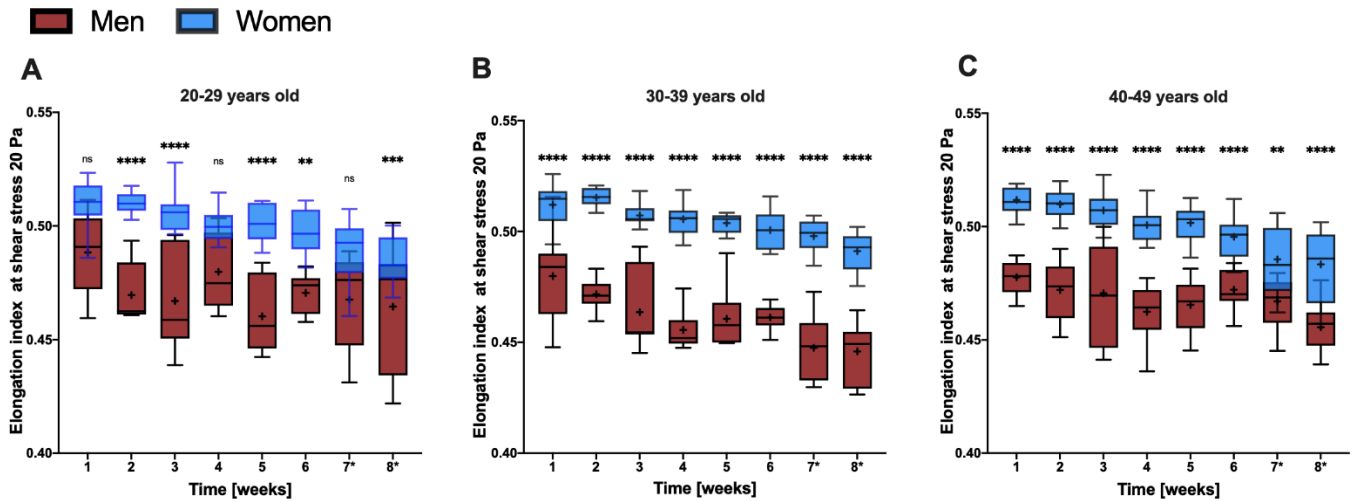

**Supplementary Figure 3. Storage time-dependent changes in pRBCs deformability in men and women according to their age: A) 20-29 years old B) 30-39 years old C) 40-49 years old.** Elongation index was measured weekly with use of ektacytometry throughout 8 weeks of storage, \* weeks 7 and 8 are additional measurements exceeding expiration date. Data distribution is presented as box plots (median, Q1, Q3, interquartile range, min-max whiskers). Q1, Q3 indicate 25<sup>th</sup> and 75<sup>th</sup> percentiles, respectively. Normality was assessed using Shapiro-Wilk test. The significance of the differences between the medians was evaluated by Kruskal-Wallis test with the Dunn's post-hoc test if appropriate; \*\*\*\*p<0.0001 indicates significant difference between men and women in each week.
